# Supplementary material for: A Ni(ii) metal–organic framework with helical channels for the capture of iodine via guest exchange induced amorphization
Source: Royal Society of Chemistry journal article supplement (doi:10.1039/d1nj06140b), 2022-01-01
Supplement: d1nj06140b1.pdf [file d1nj06140b1.pdf]

# A Ni(II) metal-organic framework with helical channels for the capture of iodine via guest exchange induced amorphization

Jie-Fen Huang,<sup>†</sup> Shu-Qi Deng,<sup>‡</sup> Hao-Chen Hu,<sup>§</sup> Song-Liang Cai,<sup>\* †</sup> Wei-Guang Zhang,<sup>\* †</sup> Jun Fan,<sup>†</sup> Sheng-Run Zheng<sup>\*, †</sup>

<sup>†</sup>School of Chemistry, South China Normal University, Guangzhou, 510006, China.

<sup>‡</sup> Institute for Sustainable Energy/College of Sciences, Shanghai University, Shanghai, 200444, China

<sup>§</sup>School of Chemistry and Chemical Engineering, Shanghai University of Engineering Science, Shanghai, 201620, China

*School of Chemistry, South China Normal University, Guangzhou, 510006, P. R. China*

\* Corresponding author: Prof. Sheng-Run, Zheng; Prof. Wei-Guang Zhang; Dr. Song-Liang Cai

E-mail address: [zhengsr@scnu.edu.cn](mailto:zhengsr@scnu.edu.cn); [wgzhang@scnu.edu.cn](mailto:wgzhang@scnu.edu.cn); [songliangcai@m.scnu.edu.cn](mailto:songliangcai@m.scnu.edu.cn)

Tel./Fax.: +86-20-39310187

## Supporting Information

**Table S1** Crystallographic data and structure refinement summary for SCNU-Z5

| Complex                          | SCNU-Z5                                                                        |
|----------------------------------|--------------------------------------------------------------------------------|
| Empirical formula                | C <sub>91</sub> H <sub>90</sub> N <sub>31</sub> Ni <sub>2</sub> O <sub>4</sub> |
| Formula weight                   | 1799.35                                                                        |
| Crystal system                   | Trigonal                                                                       |
| Space group                      | R3 :H                                                                          |
| a / Å                            | 22.7024(11)                                                                    |
| b / Å                            | 22.7024(11)                                                                    |
| c / Å                            | 24.4575(13)                                                                    |
| α / °                            | 90                                                                             |
| β / °                            | 90                                                                             |
| γ / °                            | 120                                                                            |
| V / Å <sup>3</sup>               | 10916.6(12)                                                                    |
| Z                                | 3                                                                              |
| D / g cm <sup>-3</sup>           | 0.821                                                                          |
| μ / mm <sup>-1</sup>             | 1.670                                                                          |
| T / K                            | 193(2)                                                                         |
| R <sup>a</sup> / wR <sup>b</sup> | 0.0363 / 0.1003                                                                |
| Total / unique                   | 17166 / 8814                                                                   |

<sup>a</sup>  $R_1 = \sum ||F_o| - |F_c|| / \sum |F_o|$ , <sup>b</sup>  $wR_2 = [\sum w(F_o^2 - F_c^2)^2 / \sum w(F_o^2)]^{1/2}$ , where  $w = 1 / [\sigma^2(F_o^2) + (aP)_2 + bP]$ .  $P = (F_o^2 + 2F_c^2) / 3$ .

\*The refinement results were obtained from squeeze data.

**Table S2** Selected bond lengths [Å] and angles [°] for SCNU-Z5

| SCNU-Z5               |           |                      |           |
|-----------------------|-----------|----------------------|-----------|
| Ni(1)-N(1A)#1         | 2.050(18) | Ni(2)-N(7)#1         | 2.120(6)  |
| Ni(1)-N(1A)           | 2.050(7)  | Ni(2)-N(7)#2         | 2.120(6)  |
| Ni(1)-N(1A)#2         | 2.050(17) | Ni(2)-N(7)           | 2.120(6)  |
| Ni(1)-N(1B)           | 2.052(6)  | Ni(2)-N(5)#1         | 2.145(12) |
| Ni(1)-N(1B)#2         | 2.052(12) | Ni(2)-N(5)           | 2.145(12) |
| Ni(1)-N(1B)#1         | 2.052(16) | Ni(2)-N(5)#2         | 2.145(12) |
| Ni(1)-N(8)#2          | 2.054(6)  | Ni(2)-N(5A)#1        | 2.229(10) |
| Ni(1)-N(8)            | 2.054(6)  | Ni(2)-N(5A)          | 2.230(10) |
| Ni(1)-N(8)#1          | 2.055(6)  | Ni(2)-N(5A)#2        | 2.230(10) |
| N(1A)#1-Ni(1)-N(1A)   | 81.1(8)   | N(7)#1-Ni(2)-N(7)    | 89.8(2)   |
| N(1A)#1-Ni(1)-N(1A)#2 | 81.1(9)   | N(7)#2-Ni(2)-N(7)    | 89.8(2)   |
| N(1A)-Ni(1)-N(1A)#2   | 81.1(9)   | N(7)#1-Ni(2)-N(5)#1  | 93.9(5)   |
| N(1A)#1-Ni(1)-N(1B)#2 | 85.9(8)   | N(7)#2-Ni(2)-N(5)#1  | 83.0(5)   |
| N(1A)-Ni(1)-N(1B)#2   | 93.2(8)   | N(7)-Ni(2)-N(5)#1    | 171.9(5)  |
| N(1A)#2-Ni(1)-N(1B)#2 | 12.5(11)  | N(7)#1-Ni(2)-N(5)    | 83.0(5)   |
| N(1A)#1-Ni(1)-N(1B)#1 | 12.5(10)  | N(7)#2-Ni(2)-N(5)    | 171.9(5)  |
| N(1A)-Ni(1)-N(1B)#1   | 85.9(8)   | N(7)-Ni(2)-N(5)      | 93.9(5)   |
| N(1A)#2-Ni(1)-N(1B)#1 | 93.2(9)   | N(5)#1-Ni(2)-N(5)    | 93.7(7)   |
| N(1B)-Ni(1)-N(1B)#1   | 97.1(8)   | N(7)#1-Ni(2)-N(5)#2  | 171.9(5)  |
| N(1B)#2-Ni(1)-N(1B)#1 | 97.1(7)   | N(7)#2-Ni(2)-N(5)#2  | 93.9(5)   |
| N(1A)#1-Ni(1)-N(8)#2  | 173.8(7)  | N(7)-Ni(2)-N(5)#2    | 83.0(5)   |
| N(1A)-Ni(1)-N(8)#2    | 93.6(3)   | N(5)#1-Ni(2)-N(5)#2  | 93.7(7)   |
| N(1A)#2-Ni(1)-N(8)#2  | 95.0(6)   | N(5)-Ni(2)-N(5)#2    | 93.7(7)   |
| N(1A)#1-Ni(1)-N(8)    | 93.6(6)   | N(7)#1-Ni(2)-N(5A)#1 | 87.6(4)   |
| N(1A)-Ni(1)-N(8)      | 95.0(3)   | N(7)#2-Ni(2)-N(5A)#1 | 89.2(4)   |
| N(1A)#2-Ni(1)-N(8)    | 173.8(7)  | N(7)-Ni(2)-N(5A)#1   | 177.3(4)  |
| N(1B)-Ni(1)-N(8)      | 91.3(3)   | N(5)#1-Ni(2)-N(5A)#1 | 8.9(7)    |
| N(1B)#2-Ni(1)-N(8)    | 171.6(8)  | N(5)-Ni(2)-N(5A)#1   | 86.7(6)   |
| N(1B)#1-Ni(1)-N(8)    | 81.7(7)   | N(5)#2-Ni(2)-N(5A)#1 | 99.7(5)   |
| N(8)#2-Ni(1)-N(8)     | 90.0(2)   | N(7)#1-Ni(2)-N(5A)   | 89.2(4)   |
| N(1A)#1-Ni(1)-N(8)#1  | 95.0(8)   | N(7)#2-Ni(2)-N(5A)   | 177.3(4)  |
| N(1A)-Ni(1)-N(8)#1    | 173.8(3)  | N(7)-Ni(2)-N(5A)     | 87.6(4)   |
| N(1A)#2-Ni(1)-N(8)#1  | 93.6(9)   | N(5A)#1-Ni(2)-N(5A)  | 93.3(6)   |
| N(1B)-Ni(1)-N(8)#1    | 171.6(3)  | N(7)#1-Ni(2)-N(5A)#2 | 177.3(4)  |
| N(1B)#2-Ni(1)-N(8)#1  | 81.7(8)   | N(7)#2-Ni(2)-N(5A)#2 | 87.6(4)   |
| N(1B)#1-Ni(1)-N(8)#1  | 91.3(7)   | N(7)-Ni(2)-N(5A)#2   | 89.2(4)   |
| N(8)#2-Ni(1)-N(8)#1   | 90.0(2)   | N(5)#1-Ni(2)-N(5A)#2 | 86.7(6)   |
| N(8)-Ni(1)-N(8)#1     | 90.0(2)   | N(5)-Ni(2)-N(5A)#2   | 99.7(5)   |
| N(7)#1-Ni(2)-N(7)#2   | 89.8(2)   | N(5)#2-Ni(2)-N(5A)#2 | 8.9(7)    |

Symmetry transformations used to generate equivalent atoms: #1 -y + 1, x - y, z; #2 -x + y + 1, -x + 1, z; #3 x - 2/3, y - 1/3, z - 1/3; #4 x + 1/3, y + 2/3, z + 2/3; #5 x - 1/3, y - 2/3, z - 2/3; #6 x + 2/3, y + 1/3, z + 1/3.

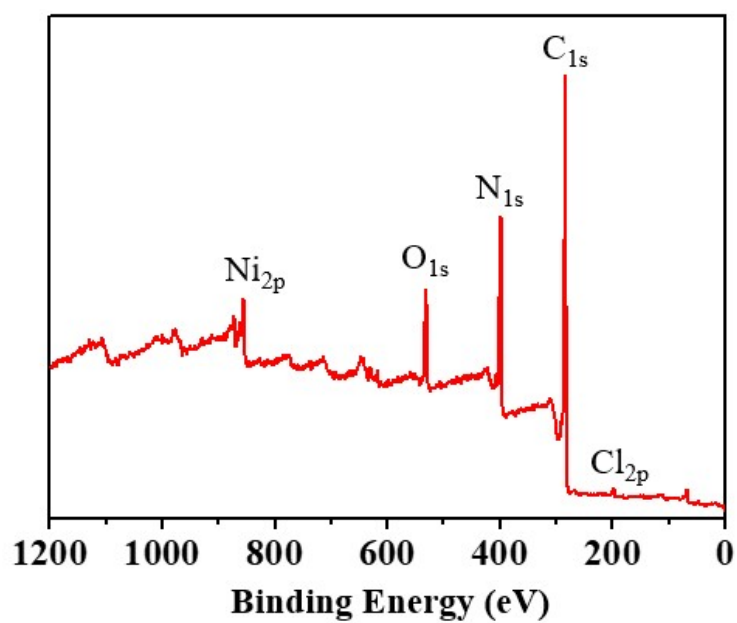

**Fig. S1** XPS full-survey scan spectrum of as-synthesized SCNU-Z5.

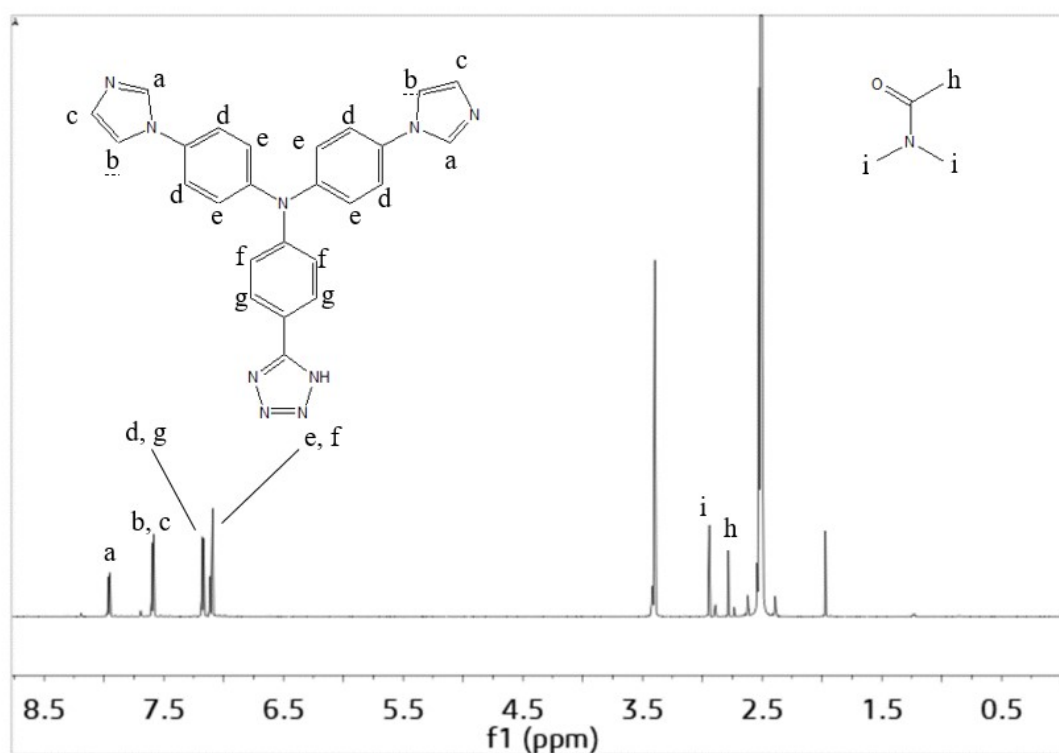

**Fig. S2**  $^1\text{H}$ NMR of the solution after digestion of SCNU-Z5 with NaOH.

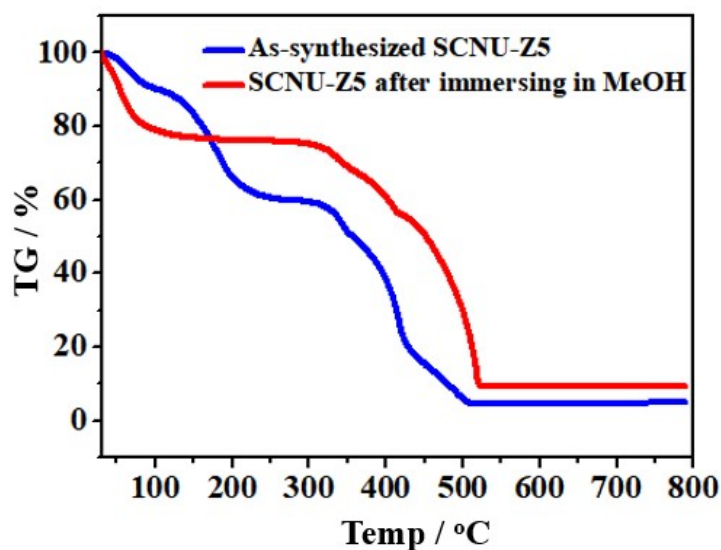

**Fig. S3** The TG curves of SCNU-Z5 and SCNU-Z5 that after immersing in MeOH.

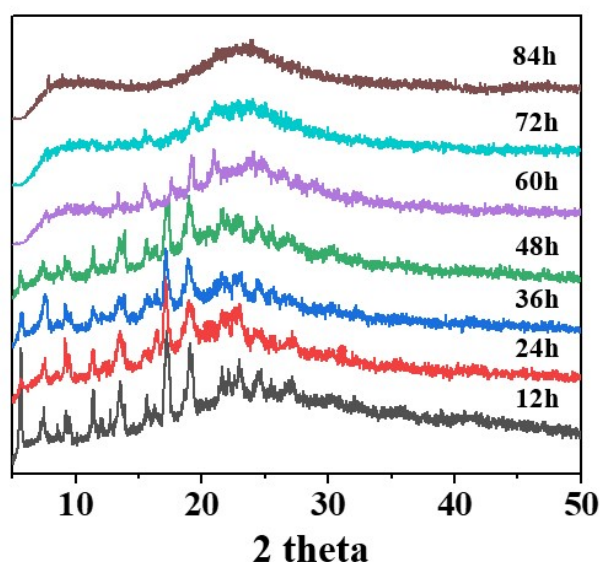

**Fig. S4** The PXRD of SCNU-Z5 after immersing in water with different time.

#### Adsorption kinetics study.

The adsorption data were studied using pseudo-first-order and pseudo-second-order equation equations.

The pseudo-first-order equation is shown below:

$$\ln(Q_e - Q_t) = \ln Q_e - k_1 t$$

where  $k_1$  is the pseudo-first-order rate constant ( $\text{min}^{-1}$ ),  $Q_e$  and  $Q_t$  are the adsorption capacity at equilibrium and at the time of  $t$ , respectively.

The pseudo-second-order equation is shown below:

$$t/Q_t = 1/(k_2 Q_e^2) + t/Q_e$$

where  $k_2$  is the pseudo-second-order rate constant (mg/g·min),  $Q_e$  and  $Q_t$  are the adsorption capacity at equilibrium and at the time of  $t$ , respectively.

#### Adsorption isotherms study.

The Langmuir, Freundlich and Temkin equations were selected to fit the data.

Langmuir model is the most widely used model based on the assumption of a monolayer adsorption on a homogeneous surface. It can be given by:

$$\frac{c_e}{Q_e} = \frac{1}{Q_m b} + \frac{c_e}{Q_m}$$

where  $c_e$  (mg L<sup>-1</sup>) is the equilibrium concentration of MB in solution,  $Q_e$  (mg g<sup>-1</sup>) is the adsorption capacity at equilibrium,  $Q_m$  (mg g<sup>-1</sup>) and  $b$  (L mg<sup>-1</sup>) represent the maximum adsorption capacity of adsorbents and the energy of adsorption, respectively.

Freundlich model is another widely applied isothermal model based on the assumption that adsorption energy decays exponentially with coverage rise. The Freundlich equation is given as:

$$\ln Q_e = \ln k_F + \frac{1}{n} \ln c_e$$

where  $k_F$  [(mg g<sup>-1</sup>)(L mg<sup>-1</sup>)<sup>1/n</sup>] is a constant indicative of the adsorption capacity of the adsorbent and  $(1/n)$  of the adsorption intensity.

Tempkin model is a widely used isothermal model based on the assumption that adsorption energy decreases linearly with coverage rise. The Tempkin equation is given as:

$$Q_e = B \ln(A) + B \ln C_e$$

where  $B = (RT/b)$  is related to the heat of adsorption,  $A$  is the equilibrium binding constant,  $T$  (K) is the absolute temperature and  $R$  is the universal gas constant.

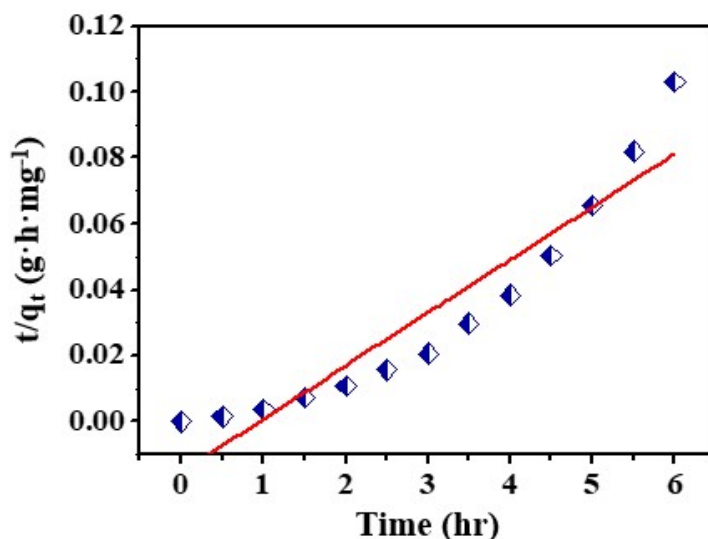

**Fig. S5** Plot of the pseudo-second order kinetic model for the adsorption of  $I_2$  on SCNU-Z5.

**Table S3.** The equilibrium capacities, pseudo-first order and pseudo-second order rate constants and correlation coefficient  $R^2$  of SCNU-Z5 adsorbing  $I_2$ .

| $q_{e, \text{Exp}}$ (mg/g) | Pseudo-first order                        |                            |        | Pseudo-second order                       |                                                |       | $R^2$ |
|----------------------------|-------------------------------------------|----------------------------|--------|-------------------------------------------|------------------------------------------------|-------|-------|
|                            | $q_{e, \text{Cal}}$ (mg·g <sup>-1</sup> ) | $K_1$ (min <sup>-1</sup> ) | $R^2$  | $q_{e, \text{Cal}}$ (mg·g <sup>-1</sup> ) | $K_2$ (g·mg <sup>-1</sup> ·min <sup>-1</sup> ) | $R^2$ |       |
|                            | 347.9                                     | 0.302                      | 0.9960 | 62.11                                     | $-1.03 \times 10^{-9}$                         | 0.881 |       |

**Table S4.** A summary of some representative MOFs for the iodine capture in various media and their uptake capacities.

| MOFs                                                       | Sorption medium | Maximum $q_m$ (mg·g) | Ref       |
|------------------------------------------------------------|-----------------|----------------------|-----------|
| UiO-66-PYDC                                                | cyclohexane     | 1250                 | S1        |
| UiO-66                                                     | cyclohexane     | 401                  | S1        |
| JLNU-4                                                     | cyclohexane     | 680                  | S2        |
| Th-TATAB                                                   | cyclohexane     | 750                  | S3        |
| Th-SINAP-7                                                 | cyclohexane     | 107                  | S4        |
| Th-SINAP-8                                                 | cyclohexane     | 258                  | S4        |
| Th-TTHA                                                    | cyclohexane     | 562                  | S5        |
| AgNPs@UiO-66                                               | cyclohexane     | 1260                 | S6        |
| SCNU-Z4                                                    | cyclohexane     | 237                  | S7        |
| SCNU-Z5                                                    | cyclohexane     | 442                  | This work |
| Mn-MOF                                                     | water           | 1.1                  | S8        |
| SCNU-Z4                                                    | water           | 332                  | S7        |
| SCNU-Z5                                                    | water           | 351                  | This work |
| $Zr_6(\mu_3\text{-O})_4(\mu_3\text{-OH})_4(\text{ITTC})_4$ | $I_2$ vapor     | 2.92                 | S9        |
| UPC-158                                                    | $I_2$ vapor     | 1.77                 | S9        |

Continued

|             |                      |       |           |
|-------------|----------------------|-------|-----------|
| Th-SINAP-7  | I <sub>2</sub> vapor | 0.352 | S4        |
| Th-SINAP-8  | I <sub>2</sub> vapor | 0.473 | S4        |
| MOF-808     | I <sub>2</sub> vapor | 2.18  | S10       |
| HKUST-1     | I <sub>2</sub> vapor | 1.75  | S11       |
| NU-1000     | I <sub>2</sub> vapor | 1.45  | S10       |
| ZIF-8       | I <sub>2</sub> vapor | 1.25  | S12       |
| MFM-300(In) | I <sub>2</sub> vapor | 1.16  | S13       |
| UiO-67      | I <sub>2</sub> vapor | 0.53  | S10       |
| AlOC-28-NC  | I <sub>2</sub> vapor | 0.621 | S14       |
| JNU-200     | I <sub>2</sub> vapor | 1.08  | S15       |
| SCNU-Z5     | I <sub>2</sub> vapor | 1.68  | This work |

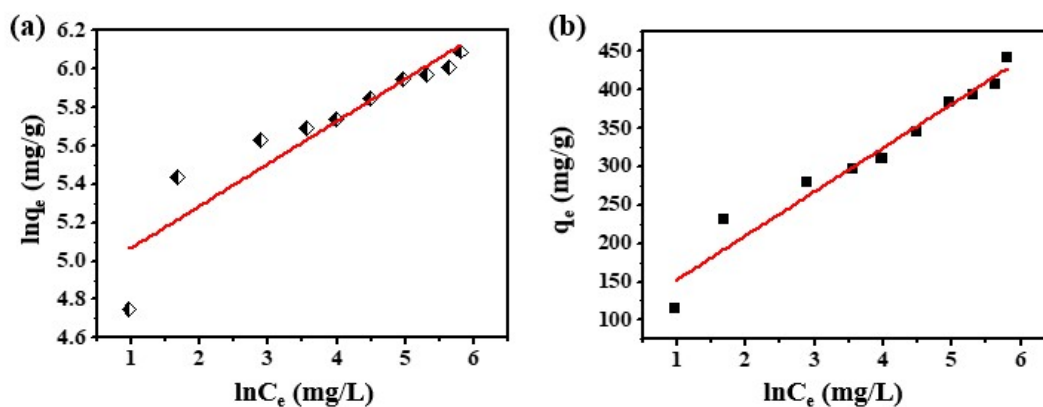

**Fig. S6** Plots of the fitting of the I<sub>2</sub> adsorption on SCNU-Z5 experimental data with (a) Freundlich and (b) Temkin isotherm models.

**Table S5.** Parameters of the adsorption of I<sub>2</sub> on SCNU-Z5.

| Models     | Parameters                                                       |        |
|------------|------------------------------------------------------------------|--------|
| Langmuir   | $q_m$ (mg·g <sup>-1</sup> )                                      | 438.6  |
|            | $b$ (L·mg <sup>-1</sup> )                                        | 0.067  |
|            | $R^2$                                                            | 0.9933 |
| Freundlich | $n$                                                              | 4.54   |
|            | $k_F$ (mg·g <sup>-1</sup> (L·mg <sup>-1</sup> ) <sup>1/n</sup> ) | 127.5  |
|            | $R^2$                                                            | 0.8513 |
| Tempkin    | $A$ (L·g <sup>-1</sup> )                                         | 5.36   |
|            | $B$                                                              | 57.18  |
|            | $R^2$                                                            | 0.9508 |

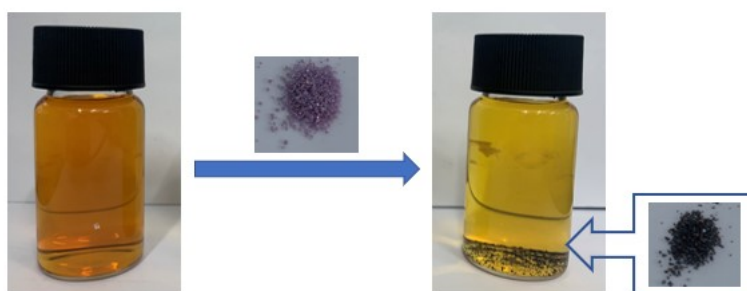

**Fig. S7** The color change of the solutions and solids before and after iodine capture in water.

## Details for I<sub>2</sub> titration

### Step 1. Preparation of 0.01000 M Na<sub>2</sub>S<sub>2</sub>O<sub>3</sub> standard solution

Pipette 10.00 ml of 0.1000 M Na<sub>2</sub>S<sub>2</sub>O<sub>3</sub> standard solution, put it into a 100 ml volumetric flask, dilute it with water, and fix the volume after cooling.

### Step 2. Determination of iodine in aqueous solution by titration

Take 10 ml of iodine aqueous solution. Then, the concentrations were determined by titrating against Na<sub>2</sub>S<sub>2</sub>O<sub>3</sub> standard solution (0.01000 M). The experiments were performed three times and the average value is used for following calculation.

### Step 3. Calculation of amount of iodine removed from aqueous iodine solution

The data is below:

| Readings                    | Volume of I <sub>2</sub><br>(mL) | Volume of Na <sub>2</sub> S <sub>2</sub> O <sub>3</sub><br>(mL) | M I <sub>2</sub> (mg/L) |
|-----------------------------|----------------------------------|-----------------------------------------------------------------|-------------------------|
| Before                      | 20.00                            | 6.97                                                            | 447.6                   |
| After immersing for<br>36 h | 10.00                            | 1.50                                                            | 96.38                   |

The mass of I<sub>2</sub> adsorbed by SCNU-Z5 is

$$m_{I_2} = (447.6 - 96.38) \times 10 \times 10^{-3} = 3.512 \text{ mg}$$

The mass of I<sub>2</sub> adsorbed by per gram of SCNU-Z5 is

$$m = 3.512 / 10 \times 1000 = 351.2 \text{ mg/g}$$



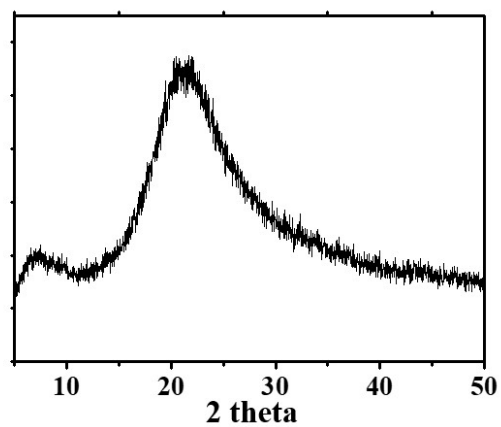

**Fig. S8** PXR D data of  $I_2$  loaded SCNU-Z5 sample that after iodine adsorption in water for 12 h.

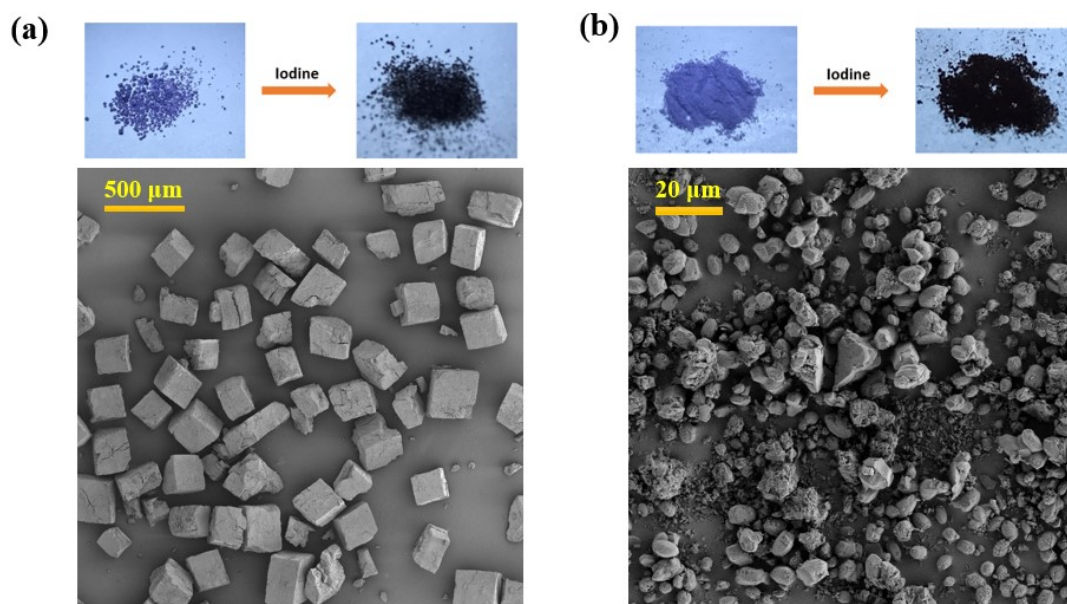

**Fig. S9** The pictures of (a) non-ground and (b) ground samples before and after iodine adsorption in water and their corresponding SEM image before iodine adsorption.

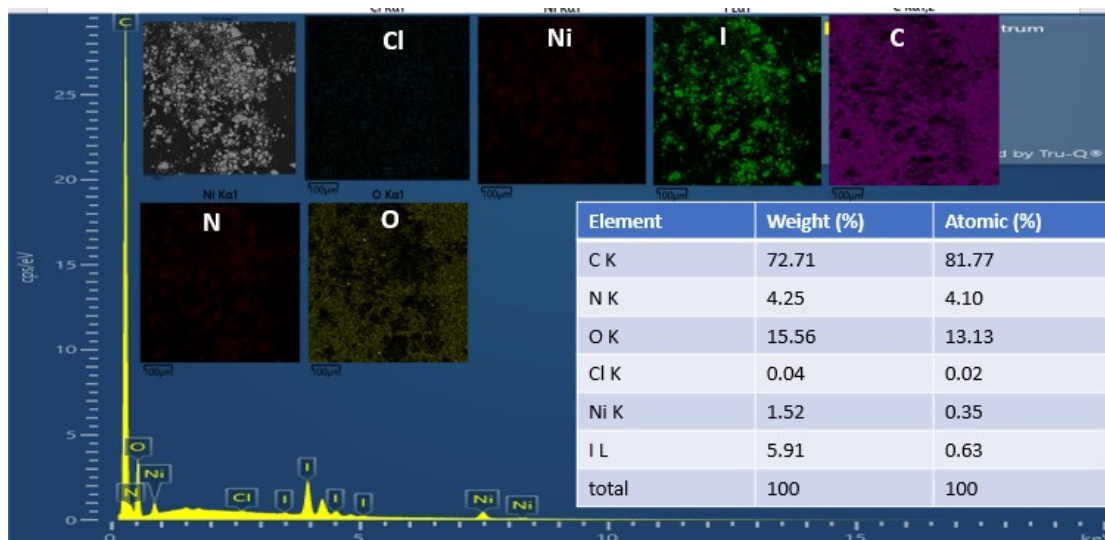

**Fig. S10** SEM-EDS mapping and EDS spectra profiles of I<sub>2</sub>@SCNU-Z5-water.

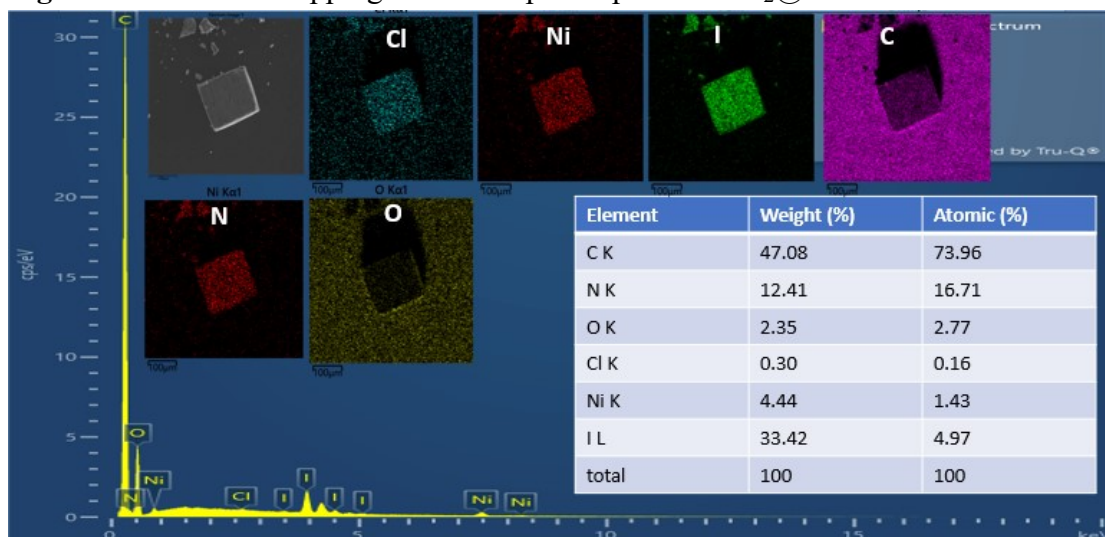

**Fig. S11** SEM-EDS mapping and EDS spectra profiles of I<sub>2</sub>@SCNU-Z5-cyclohexane.

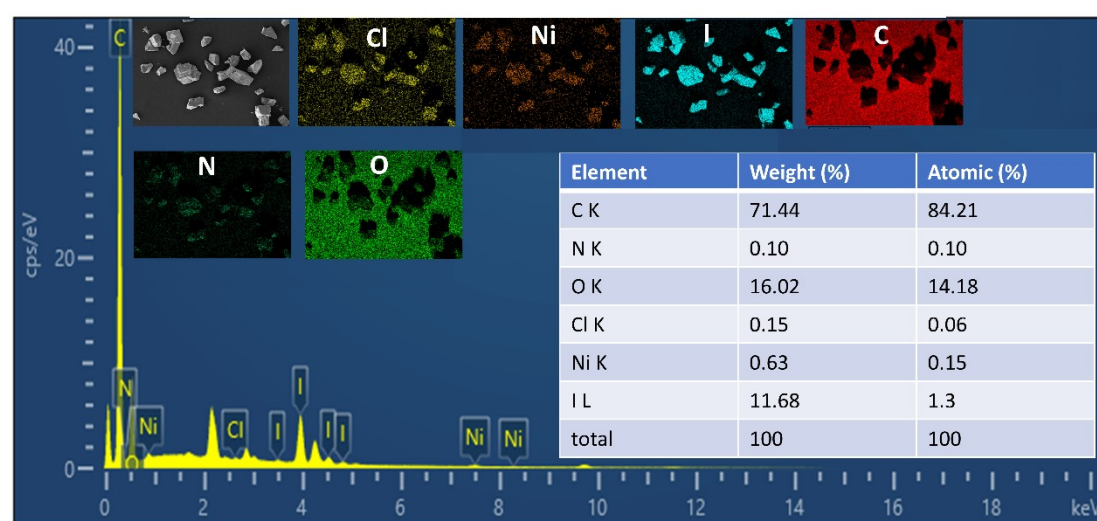

**Fig. S12** SEM-EDS mapping and EDS spectra profiles of I<sub>2</sub>@SCNU-Z5-vapor.

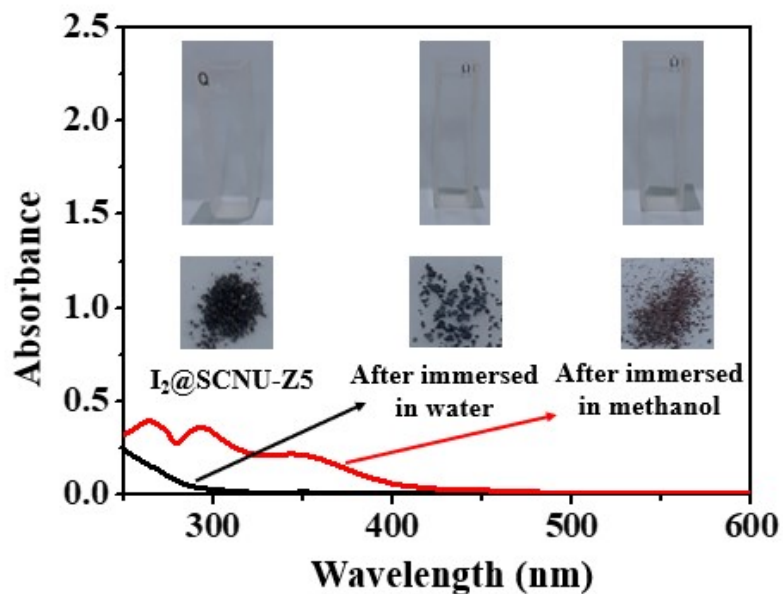

**Fig. S13** The UV-Vis spectra of the water and methanol solution after immersing with  $I_2@SCNU-Z5$  for 7 days. (Inserted are the figures for the color change of the solutions and the solids)

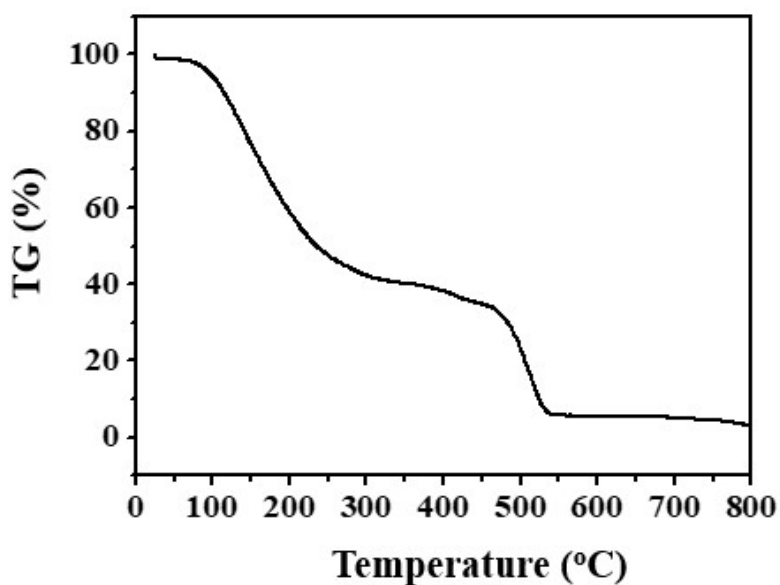

**Fig. S14** The TG curve of  $I_2@SCNU-Z5$ .

## Reference

- (1) Wang, Z.; Huang, Y.; Yang, J.; Li, Y.; Zhuang, Q.; Gu, J. *Dalton Trans.* **2017**, *46*, 7412–7420.
- (2) Yao, C.; Wang, W.; Zhang, S. R.; Li, H. Y.; Xu, Y. H.; Su, Z. M.; Che, G. B. *RSC Adv.* **2018**, *8*, 36400–36406.

- (3) Zhang, N.; Sun, L.X.; Xing, Y. H.; Bai, F. Y. *Cryst. Growth Des.* **2019**, *19*, 5686–5695.
- (4) Li, Z. J.; Yue, Z.; Wu, X.; Ren, Y.; Wang, S.; Li, Y.; Zhang, Z. H.; Guo, X.; Lin, J.; Wang, J. Q. *Inorg. Chem.* **2020**, *59*, 4435–4442.
- (5) Zhang, N.; Sun, L. X.; Bai, F. Y.; Xing, Y. H. *Inorg. Chem.* **2020**, *59*, 3964–3973.
- (6) Feng, Y.; Yang, P.; Li, Y.; Gu J. *J. Chem. Eng. Data* **2020**, *65*, 1986–1992.
- (7) S7 ICF Wang, G. Q.; Huang, J. F.; Huang, X. F.; Deng, S. Q.; Zheng, S. R.; Cai, S. L.; Fan, J.; Zhang, W. G. *Inorg. Chem. Front.* **2021**, *8*, 1083–1092.
- (8) Gogia, A.; Das, P.; Mandal, S. K. *ACS Appl. Mater. Interfaces* **2020**, *12*, 46107–46118.
- (9) Guo, B.; Li, F.; Wang, C.; Zhang, L.; Sun, D. *J. Mater. Chem. A* **2019**, *7*, 13173–13179.
- (10) Chen, P.; He, X. H.; Pang, M. B.; Dong, X. T.; Zhao, S.; Zhang, W. *ACS Appl. Mater. Interfaces* **2020**, *12*, 20429–20439.
- (11) Sava, D. F.; Chapman, K. W.; Rodriguez, M. A.; J. Greathouse, A.; Crozier, P. S.; Zhao, H.; Chupas P. J.; Nenoff, T. M. *Chem. Mater.* **2013**, *25*, 2591–2596.
- (12) Sava, D. F.; Rodriguez, M. A.; Chapman, K. W.; Chupas, P. J.; Greathouse, J. A.; Crozier, P. S.; Nenoff, T. M. *J. Am. Chem. Soc.* **2011**, *133*, 12398–12401.
- (13) Zhang, X.; da Silva, I.; Godfrey, H. G. W.; Callear, S. K.; Sapchenko, S. A.; Cheng, Y.; Vitorica-Yrezabal, I.; Frogley, M. D.; Cinque, G.; Tang, C. C.; Giacobbe, C.; Dejoie, C.; Rudic, S.; Ramirez-Cuesta, A. J.; Denecke, M. A.; Yang, S.; Schroder, M. *J. Am. Chem. Soc.* **2017**, *139*, 16289–16296.
- (14) Yao, S.; Fang, W. H.; Sun, Y.; S. Wang, T.; Zhang, J. *J. Am. Chem. Soc.* **2021**, DOI: 10.1021/jacs.0c11778.
- (15) Wu, K.; Huang, Y.-L.; Zheng, J.; Luo, D.; Xie, M.; Li, Y. Y.; Lu, W.; Li, D. *Mater. Chem. Front.* **2021**, *5*, 4300–4309.
